# Supplementary material for: Dietary protein increases T-cell-independent sIgA production through changes in gut microbiota-derived extracellular vesicles
Source: PubMed Central journal article supplement (PMC9329401; doi:10.1038/s41467-022-31761-y), 2022-07-27
Supplement: 41467_2022_31761_MOESM3_ESM.pdf [file 41467_2022_31761_MOESM3_ESM.pdf]

## Reporting Summary

Nature Portfolio wishes to improve the reproducibility of the work that we publish. This form provides structure for consistency and transparency in reporting. For further information on Nature Portfolio policies, see our [Editorial Policies](#) and the [Editorial Policy Checklist](#).

### Statistics

For all statistical analyses, confirm that the following items are present in the figure legend, table legend, main text, or Methods section.

- |                                     |                                                                                                                                                                                                                                                                                                |
|-------------------------------------|------------------------------------------------------------------------------------------------------------------------------------------------------------------------------------------------------------------------------------------------------------------------------------------------|
| n/a                                 | Confirmed                                                                                                                                                                                                                                                                                      |
| <input type="checkbox"/>            | <input checked="" type="checkbox"/> The exact sample size ( $n$ ) for each experimental group/condition, given as a discrete number and unit of measurement                                                                                                                                    |
| <input type="checkbox"/>            | <input checked="" type="checkbox"/> A statement on whether measurements were taken from distinct samples or whether the same sample was measured repeatedly                                                                                                                                    |
| <input type="checkbox"/>            | <input checked="" type="checkbox"/> The statistical test(s) used AND whether they are one- or two-sided<br><i>Only common tests should be described solely by name; describe more complex techniques in the Methods section.</i>                                                               |
| <input checked="" type="checkbox"/> | <input type="checkbox"/> A description of all covariates tested                                                                                                                                                                                                                                |
| <input type="checkbox"/>            | <input checked="" type="checkbox"/> A description of any assumptions or corrections, such as tests of normality and adjustment for multiple comparisons                                                                                                                                        |
| <input type="checkbox"/>            | <input checked="" type="checkbox"/> A full description of the statistical parameters including central tendency (e.g. means) or other basic estimates (e.g. regression coefficient) AND variation (e.g. standard deviation) or associated estimates of uncertainty (e.g. confidence intervals) |
| <input type="checkbox"/>            | <input checked="" type="checkbox"/> For null hypothesis testing, the test statistic (e.g. $F$ , $t$ , $r$ ) with confidence intervals, effect sizes, degrees of freedom and $P$ value noted<br><i>Give <math>P</math> values as exact values whenever suitable.</i>                            |
| <input checked="" type="checkbox"/> | <input type="checkbox"/> For Bayesian analysis, information on the choice of priors and Markov chain Monte Carlo settings                                                                                                                                                                      |
| <input checked="" type="checkbox"/> | <input type="checkbox"/> For hierarchical and complex designs, identification of the appropriate level for tests and full reporting of outcomes                                                                                                                                                |
| <input checked="" type="checkbox"/> | <input type="checkbox"/> Estimates of effect sizes (e.g. Cohen's $d$ , Pearson's $r$ ), indicating how they were calculated                                                                                                                                                                    |

*Our web collection on [statistics for biologists](#) contains articles on many of the points above.*

### Software and code

Policy information about [availability of computer code](#)

|                 |                                                                                                                                                                                                                                                                                                                                                                                                                                                                                                                                                                                                     |
|-----------------|-----------------------------------------------------------------------------------------------------------------------------------------------------------------------------------------------------------------------------------------------------------------------------------------------------------------------------------------------------------------------------------------------------------------------------------------------------------------------------------------------------------------------------------------------------------------------------------------------------|
| Data collection | Flow cytometry data was acquired on an LSRII (BD) using BD FACS DIVA software v8.0.2. Particle data was acquired with the Nanosight300 with the NTA software v3.2. qPCR data was acquired using the LightCycler 480 Instrument and the LightCycler software v1.5.0. Immunohistochemistry data was captured with an Olympus BX51 Microscope using the cellSens Standard v1.12 software. 16S rRNA gene sequencing data was acquired on a Illumina MiSeq. Optical density and fluorescence measurements were acquired using the TECAN Infinite M1000 PRO using the Tecan i-control v1.10.4.0 software. |
| Data analysis   | Microsoft Excel (Office 365 build 2203)<br>Flowjo v10.4.2<br>Graphpad prism 9<br>Living Image 4.5<br>Aperio ImageScope v12.3.3<br>FIJI v1.52p<br>R Software 3.6.1 with RStudio 1.4.1717<br>The following R packages were used: mixexp (1.2.5), plyr (1.8.6), scales (1.1.1), directlabels (2021.1.13), sp (1.4-5), readr (1.4.0), vegan (2.5-7), zCompositions (1.3.4), phyloseq (1.32.0), microbiome (1.10.0), dada2 (1.16.0), ALDEx2 (1.20.0), metagMisc (0.0.4), ranacapa (0.1.0), phangorn (2.5.5), dada2 (1.12.1)                                                                              |

For manuscripts utilizing custom algorithms or software that are central to the research but not yet described in published literature, software must be made available to editors and reviewers. We strongly encourage code deposition in a community repository (e.g. GitHub). See the Nature Portfolio [guidelines for submitting code & software](#) for further information.

## Data

Policy information about [availability of data](#)

All manuscripts must include a [data availability statement](#). This statement should provide the following information, where applicable:

- Accession codes, unique identifiers, or web links for publicly available datasets
- A description of any restrictions on data availability
- For clinical datasets or third party data, please ensure that the statement adheres to our [policy](#)

DNA sequencing data were deposited in the European Nucleotide Archive under accession number PRJEB39583 [<https://www.ebi.ac.uk/ena/browser/view/PRJEB39583>]. Source data are provided with this paper. Other data supporting the findings of this study are available from the corresponding author upon request.

## Field-specific reporting

Please select the one below that is the best fit for your research. If you are not sure, read the appropriate sections before making your selection.

- Life sciences  Behavioural & social sciences  Ecological, evolutionary & environmental sciences

For a reference copy of the document with all sections, see [nature.com/documents/nr-reporting-summary-flat.pdf](https://nature.com/documents/nr-reporting-summary-flat.pdf)

## Life sciences study design

All studies must disclose on these points even when the disclosure is negative.

|                 |                                                                                                                                                                                                                                                                                                                                                                                                                                                                                                                                                                                                                                                                                  |
|-----------------|----------------------------------------------------------------------------------------------------------------------------------------------------------------------------------------------------------------------------------------------------------------------------------------------------------------------------------------------------------------------------------------------------------------------------------------------------------------------------------------------------------------------------------------------------------------------------------------------------------------------------------------------------------------------------------|
| Sample size     | No sample size calculation was performed, sample size were determined based on prior similar experiments (Tan et al, 2017, Cell Reports) and according to the principles of the 3Rs (Replacement, Reduction and Refinement).                                                                                                                                                                                                                                                                                                                                                                                                                                                     |
| Data exclusions | No successfully acquired data was excluded.                                                                                                                                                                                                                                                                                                                                                                                                                                                                                                                                                                                                                                      |
| Replication     | The number of independent replication of experiments is indicated in the corresponding figure legend for each figure.                                                                                                                                                                                                                                                                                                                                                                                                                                                                                                                                                            |
| Randomization   | Mice were age and sex-matched for each experiment, and beddings were mixed between cages to normalise microbiome composition before beginning experiments. Each cage of mice were randomized to different experimental groups, but individual mice were not randomized to experimental group as male mice from different cages cannot be co-housed due to fighting post-weaning.                                                                                                                                                                                                                                                                                                 |
| Blinding        | For histological analysis of mucus thickness layer, images were scored/analyzed blinded to the study design. Histological analysis of colon sections from DDS-induced colitis mice were scored by at least 2 independent researcher who were not blinded to the study design but were blinded to the samples (images were captured and filenames deidentified for scoring). No blinding was performed for analysis of in vitro experiments as well as flow cytometry experiments as the data analysis was performed using standard operating procedure such as pre-defined gating strategies and the data as well as its analysis are quantitative in nature and not subjective. |

## Reporting for specific materials, systems and methods

We require information from authors about some types of materials, experimental systems and methods used in many studies. Here, indicate whether each material, system or method listed is relevant to your study. If you are not sure if a list item applies to your research, read the appropriate section before selecting a response.

### Materials & experimental systems

| n/a                                 | Involved in the study                                           |
|-------------------------------------|-----------------------------------------------------------------|
| <input type="checkbox"/>            | <input checked="" type="checkbox"/> Antibodies                  |
| <input type="checkbox"/>            | <input checked="" type="checkbox"/> Eukaryotic cell lines       |
| <input checked="" type="checkbox"/> | <input type="checkbox"/> Palaeontology and archaeology          |
| <input type="checkbox"/>            | <input checked="" type="checkbox"/> Animals and other organisms |
| <input checked="" type="checkbox"/> | <input type="checkbox"/> Human research participants            |
| <input checked="" type="checkbox"/> | <input type="checkbox"/> Clinical data                          |
| <input checked="" type="checkbox"/> | <input type="checkbox"/> Dual use research of concern           |

### Methods

| n/a                                 | Involved in the study                              |
|-------------------------------------|----------------------------------------------------|
| <input checked="" type="checkbox"/> | <input type="checkbox"/> ChIP-seq                  |
| <input type="checkbox"/>            | <input checked="" type="checkbox"/> Flow cytometry |
| <input checked="" type="checkbox"/> | <input type="checkbox"/> MRI-based neuroimaging    |

## Antibodies

Antibodies used

The following anti-mouse antibodies were used in this study: CD45-BV785 (30-F11) Cat#103149, CD95-APC (SA367H8) Cat#152604, GL-7-FITC (GL7) Cat#144603, B220-APC (RA3-6B2) Cat#103212, CD4-PerCP (RM4-5) Cat#100538 from BioLegend, IgA-PE (11-44-2) Cat#12-5994-81 from eBioscience, B220-VioGreen (REA755) Cat#130-110-852 from Miltenyi-Biotec

Validation

All antibodies are from commercial sources and used according to the manufacturer's instruction. Validation data are available from

the manufacturer's website (BioLegend, eBioscience and Miltenyi-Biotec):

CD45-BV785 (30-F11) Cat#103149

<https://www.biolegend.com/en-us/products/brilliant-violet-785-anti-mouse-cd45-antibody-10636>

CD95-APC (SA367H8) Cat#152604

<https://www.biolegend.com/en-us/products/apc-anti-mouse-cd95-fas-antibody-13906>

GL-7-FITC (GL7) Cat#144603

<https://www.biolegend.com/en-us/products/fitc-anti-mouse-human-gl7-antigen-t-and-b-cell-activation-marker-antibody-8284>

B220-APC (RA3-6B2) Cat#103212

<https://www.biolegend.com/en-us/products/apc-anti-mouse-human-cd45r-b220-antibody-442>

CD4-PerCP (RM4-5) Cat#100538

<https://www.biolegend.com/en-us/products/percp-anti-mouse-cd4-antibody-4229>

IgA-PE (11-44-2) Cat#12-5994-81

<https://www.thermofisher.com/antibody/product/IgA-Antibody-clone-11-44-2-Monoclonal/12-5994-81>

B220-VioGreen (REA755) Cat#130-110-852

<https://www.miltenyibiotec.com/AU-en/products/cd45r-b220-antibody-anti-mouse-reafinity-rea755.html#percp-vio-700:30-ug-in-200-ul>

## Eukaryotic cell lines

Policy information about [cell lines](#)

|                                                                      |                                                                                                                                                                                                           |
|----------------------------------------------------------------------|-----------------------------------------------------------------------------------------------------------------------------------------------------------------------------------------------------------|
| Cell line source(s)                                                  | HT29 was obtained from ATCC. HEK-Blue mTLR4 was obtained from InvivoGen                                                                                                                                   |
| Authentication                                                       | Authentication of cell line was not performed for HT29 cellline. HEK-Blue mTLR4 cell line was validated functionally, based on its reporter activity against TLR4 ligand using LPS as a positive control. |
| Mycoplasma contamination                                             | Cell lines were routinely tested negative for mycoplasma contamination                                                                                                                                    |
| Commonly misidentified lines<br>(See <a href="#">ICLAC</a> register) | No commonly misidentified lines were used in this study                                                                                                                                                   |

## Animals and other organisms

Policy information about [studies involving animals](#); [ARRIVE guidelines](#) recommended for reporting animal research

|                         |                                                                                                                                                                                                                                                                                                                         |
|-------------------------|-------------------------------------------------------------------------------------------------------------------------------------------------------------------------------------------------------------------------------------------------------------------------------------------------------------------------|
| Laboratory animals      | Male C57BL/6 mice (6 weeks of age) were purchased from Animal Bioresource (NSW, Australia) and maintained under specific pathogen-free conditions, with a 12h light/dark cycle maintained at 22 degrees celcius, 50% humidity. Animals were housed in cages with non-edible compressed cotton fibre (iso-PADS) bedding. |
| Wild animals            | This study did not involve the use of wild animals                                                                                                                                                                                                                                                                      |
| Field-collected samples | This study did not collect samples in the field                                                                                                                                                                                                                                                                         |
| Ethics oversight        | All animals were housed in the animal facility of the Charles Perkins Centre. All experiments were performed in accordance with protocols approved by the University of Sydney Animal Ethics Committee.                                                                                                                 |

Note that full information on the approval of the study protocol must also be provided in the manuscript.

## Flow Cytometry

### Plots

Confirm that:

- The axis labels state the marker and fluorochrome used (e.g. CD4-FITC).
- The axis scales are clearly visible. Include numbers along axes only for bottom left plot of group (a 'group' is an analysis of identical markers).
- All plots are contour plots with outliers or pseudocolor plots.
- A numerical value for number of cells or percentage (with statistics) is provided.

### Methodology

|                    |                                                                                                                               |
|--------------------|-------------------------------------------------------------------------------------------------------------------------------|
| Sample preparation | Single-cell suspensions were prepared by mechanical disruption of tissues through a 100µm filter. For isolation of intestinal |
|--------------------|-------------------------------------------------------------------------------------------------------------------------------|

lamina propria cells, mesenteric fat and Peyer's patches were first resected from small intestine tissues, then tissues washed with PBS and cut into 1cm pieces and incubated in pre-digestion buffer (HBSS containing 10% FBS, 10mM HEPES, 5mM EDTA) for 40min at 37oC at 200rpm in an orbital incubator. Tissues were washed twice with PBS then cut into <1mm pieces and incubated in digestion buffer (RPMI containing 10% FBS, 10mM HEPES, 2.5mg/ml collagenase type IV (Gibco)) for 60min at 37oC at 200rpm in an orbital incubator and lymphocytes were enriched via a 40/80% Percoll gradient (GE Healthcare).

Instrument

BD LSR II flow cytometer

Software

BD FACSDiva software v8.0.2 was used for sample acquisition. FlowJo v10 was used for data analysis.

Cell population abundance

For analysis of B cells from the Peyer's patches and mesenteric lymph nodes, at least 30,000 B220+ cells was acquired for analysis. For analysis of small intestinal lamina propria lymphocytes all events were acquired for analysis.

Gating strategy

For analysis, a FSC/SSC gate was first employed to gate on cells that represents lymphocytes. A singlet gate was then applied (FSC-A vs. FSC-H), followed by exclusion of dead cells (FSC-A vs. negative Live/Dead UV staining). Following this, total lymphocyte was gated (FSC-A vs. CD45 positive staining). This population was then used to identify various cell type as described in the manuscript.

Tick this box to confirm that a figure exemplifying the gating strategy is provided in the Supplementary Information.
